# Supplementary material
Source: PubMed Central journal article supplement (PMC3742385)
Supplement: NIHMS425279-supplement-1_si_001.pdf [file NIHMS425279-supplement-1_si_001.pdf]

## Supporting Information

### Development of a Fluorescence Internal Quenching Correction Factor to Correct BoNT/A Endopeptidase Kinetics using SNAPtide

Thomas M. Feltrup and Bal Ram Singh

Botulinum Research Center, and Department of Chemistry and Biochemistry, University of Massachusetts Dartmouth, North Dartmouth, MA

In this study, fluorescence internal quenching (FIQ) correction factors were derived using an unquenched SNAPtide peptide to quantify the signal quenching over a range of SNAPtide concentrations and temperatures. The FIQ Correction Factors developed provide a convenient method to allow for improved accuracy in determining and comparing BoNT/A LC activity and kinetics using SNAPtide over a broad range of concentrations and temperatures.

This Supporting Information contains:

Figure S-1: Sample standard curve of fluorescence signal (RFU) vs. unquenched SNAPtide concentration ( $\mu\text{M}$ ) at 25°C.

Figure S-2: Sample standard curve of fluorescence signal (RFU) vs. unquenched SNAPtide concentration ( $\mu\text{M}$ ) at 30°C.

Figure S-3: Sample standard curve of fluorescence signal (RFU) vs. unquenched SNAPtide concentration ( $\mu\text{M}$ ) at 37°C.

Figure S-4: Sample standard curve of fluorescence signal (RFU) vs. unquenched SNAPtide concentration ( $\mu\text{M}$ ) at  $40^\circ\text{C}$ .

Figure S-5: Sample standard curve of fluorescence signal (RFU) vs. unquenched SNAPtide concentration ( $\mu\text{M}$ ) at  $45^\circ\text{C}$ .

Figure S-6: Sample standard curve of fluorescence signal (RFU) vs. unquenched SNAPtide concentration ( $\mu\text{M}$ ) at  $50^\circ\text{C}$ .

Figure S-7: Slope of trendline showing FIQ Correction Factor/ $\mu\text{M}$  SNAPtide calculated for each temperature.

Figure S-8: Comparison of Michaelis-Menten plots for uncalibrated and FIQ correction factor calibrated velocities for BoNT/A LC endopeptidase kinetics (100 nM LCA).

Figure S-9: Comparison of Lineweaver-Burk plots for uncalibrated and FIQ correction factor calibrated velocities for BoNT/A LC endopeptidase kinetics (100 nM LCA).

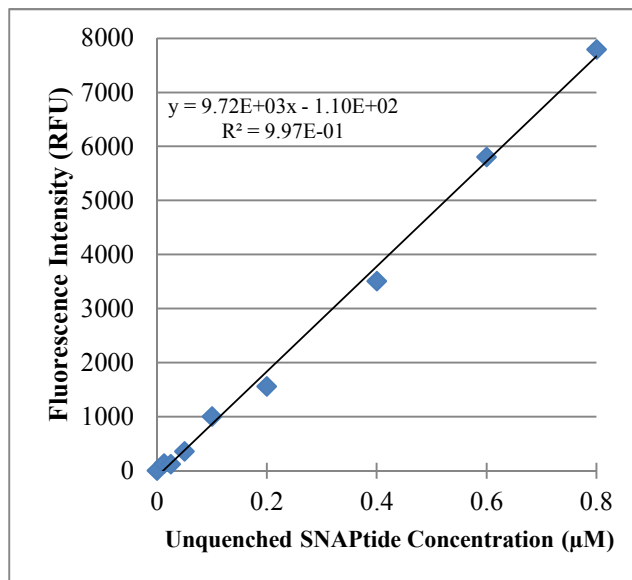

**Figure S-1:** Sample standard curve of fluorescence signal (RFU) vs. unquenched SNAPtide concentration (µM) at 25°C. Signals were normalized for the blank (0.00 µM unquenched SNAPtide).

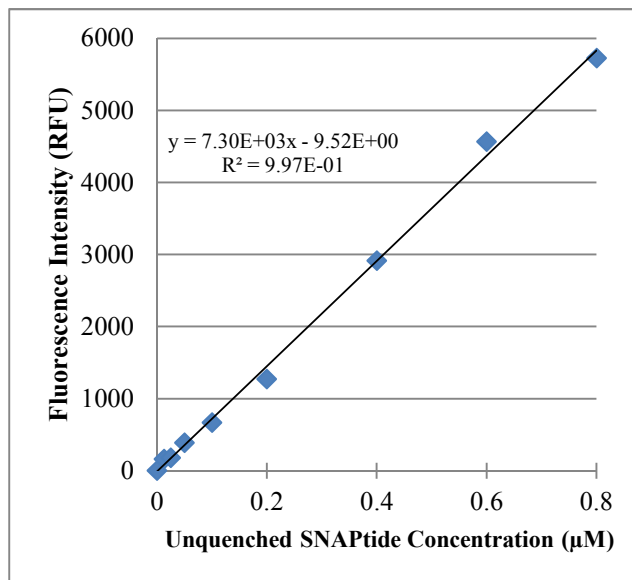

**Figure S-2:** Sample standard curve of fluorescence signal (RFU) vs. unquenched SNAPtide concentration (µM) at 30°C. Signals were normalized for the blank (0.00 µM unquenched SNAPtide).

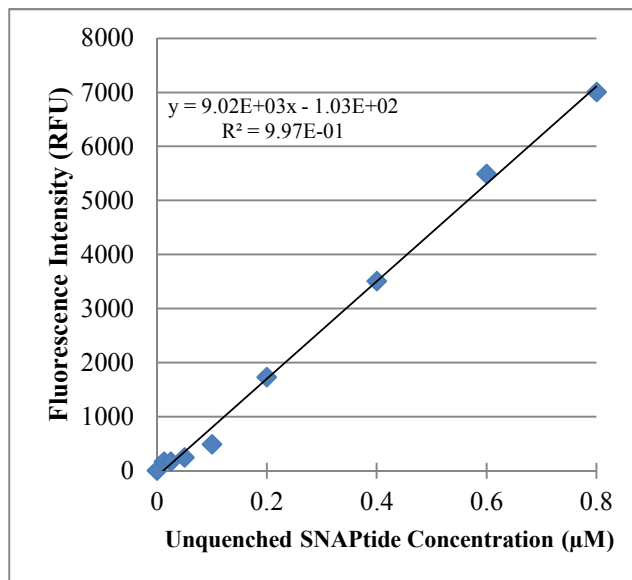

**Figure S-3:** Standard curve of fluorescence signal (RFU) vs. unquenched SNAPtide concentration (µM) at 37°C. Signals were normalized for the blank (0.00 µM unquenched SNAPtide).

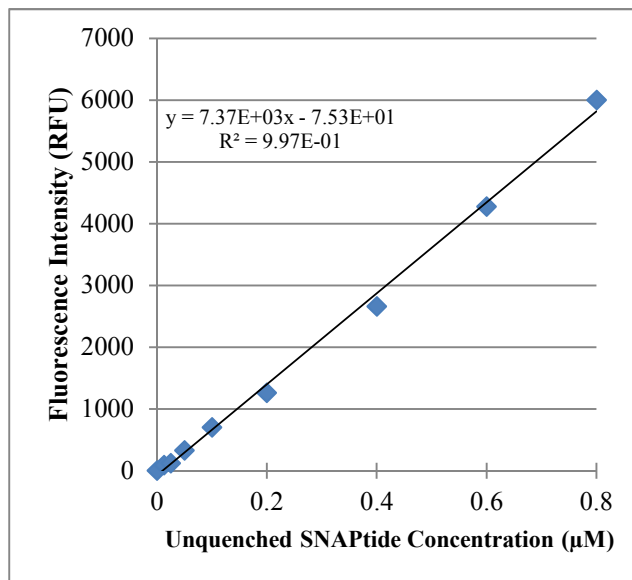

**Figure S-4:** Standard curve of fluorescence signal (RFU) vs. unquenched SNAPtide concentration (µM) at 40°C. Signals were normalized for the blank (0.00 µM unquenched SNAPtide).

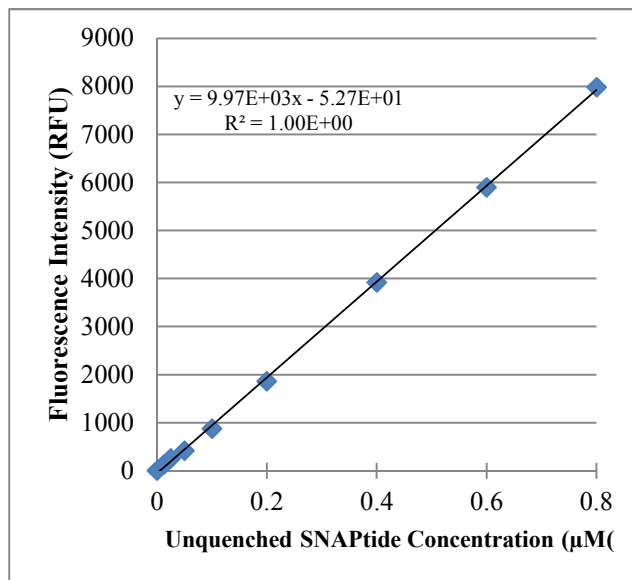

**Figure S-5:** Standard curve of fluorescence signal (RFU) vs. unquenched SNAPtide concentration (µM) at 45°C. Signals were normalized for the blank (0.00 µM unquenched SNAPtide).

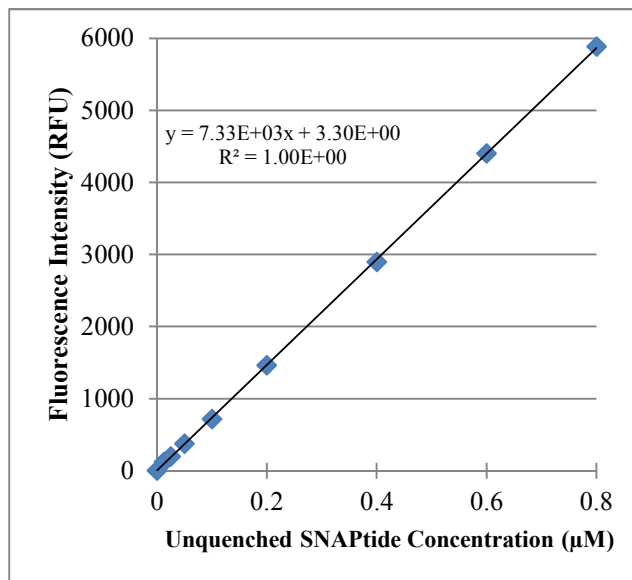

**Figure S-6:** Standard curve of fluorescence signal (RFU) vs. unquenched SNAPtide concentration (µM) at 50°C. Signals were normalized for the blank (0.00 µM unquenched SNAPtide).



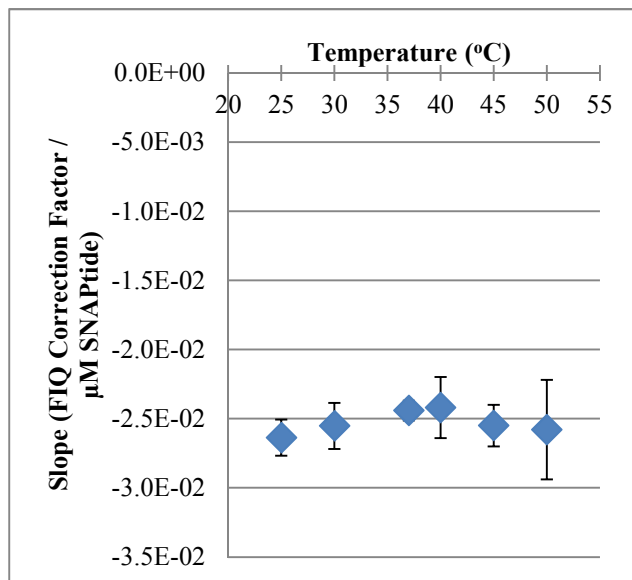

**Figure S-7:** Slope of trendline showing FIQ Correction Factor/ $\mu\text{M}$  SNAPtide calculated for each temperature. These slopes can be used to calculate FIQ Correction Factors at SNAPtide concentrations between 0.00-10.0  $\mu\text{M}$  and at reaction temperatures between 25-50°C if the 0.0  $\mu\text{M}$  SNAPtide sample is assumed to have an FIQ Correction Factor of 1.00. Error bars shown are standard deviations of the mean for triplicate samples.

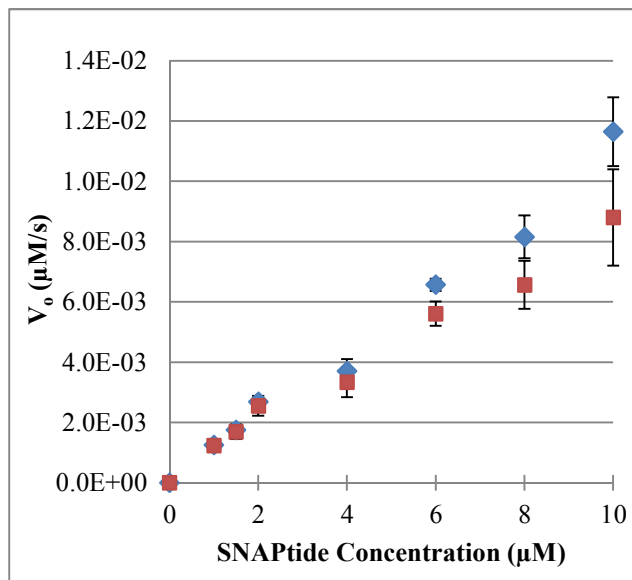

**Figure S-8:** Comparison of Michaelis-Menten plots for uncalibrated (■) and FIQ correction factor calibrated (◆) velocities for BoNT/A LC endopeptidase kinetics (100 nM LCA). Error bars shown are standard deviations of triplicate samples.

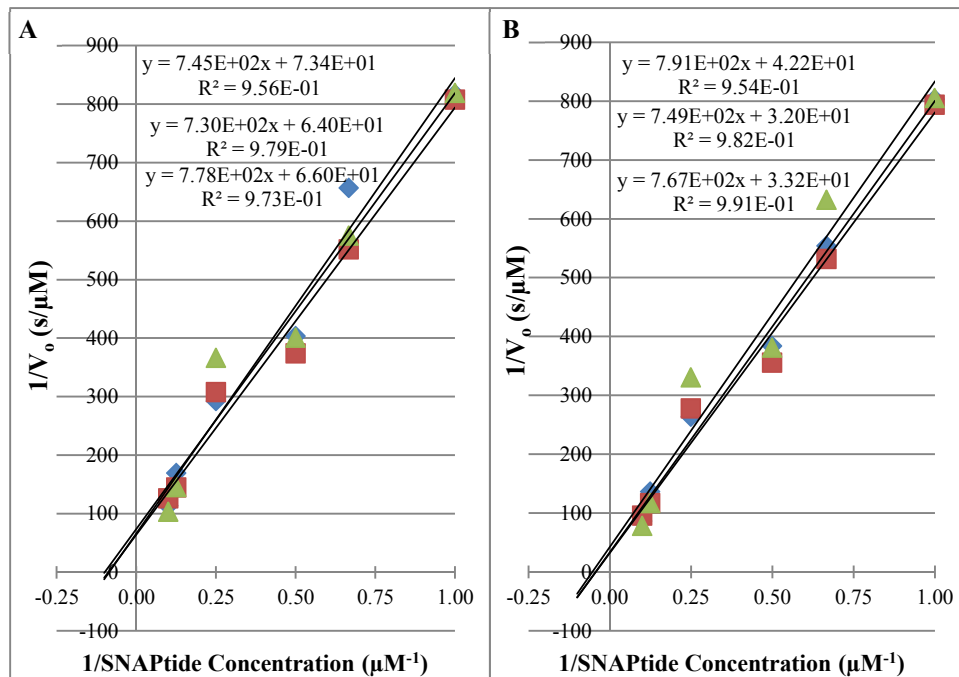

**Figure S-9:** Comparison of Lineweaver-Burk plots for uncalibrated (A) and FIQ correction factor calibrated (B) velocities for BoNT/A LC endopeptidase kinetics (100 nM LCA). Each plot shows the trendline for each of the triplicate runs. Run 1:  $\blacklozenge$  Run 2:  $\blacksquare$  Run 3:  $\blacktriangle$
